# Supplementary material
Source: Springer Nature journal article supplement (https://www.springermedizin.de/resource/supplementary/12965_2006_38_MOESM6_ESM.pdf/9572986)

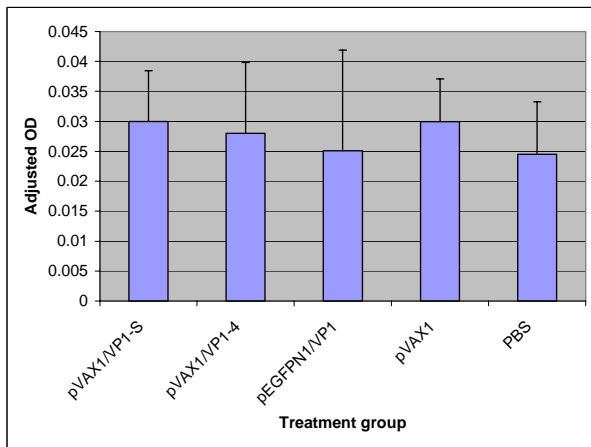

**a) Day 0**

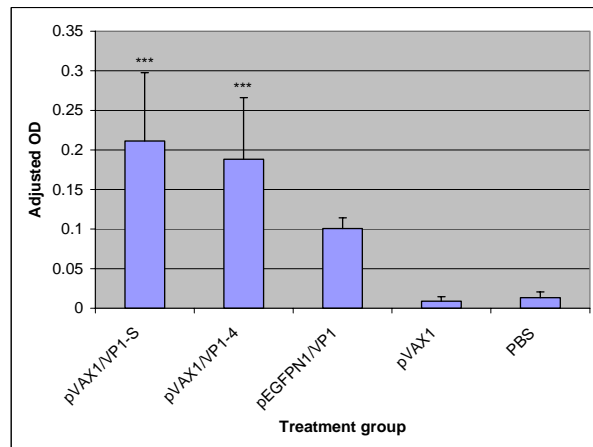

**b) Day 14**

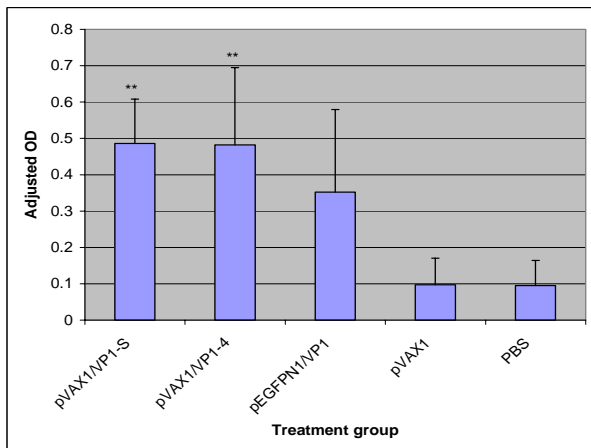

**c) Day 28**

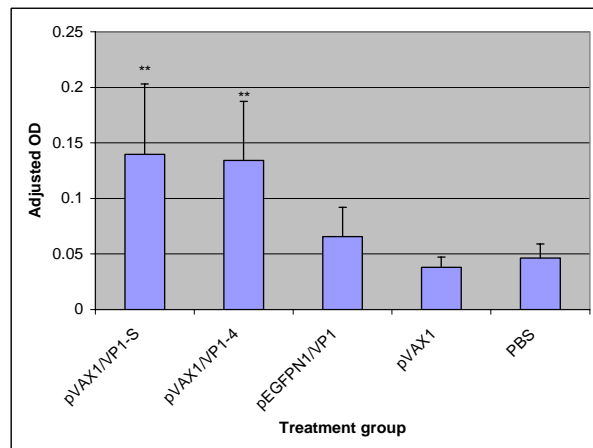

**d) Day 42**

Supplement: MOESM6 [file 9572986]
